# Supplementary material for: The Syndromes of Thrombotic Microangiopathy: A Critical Appraisal on Complement Dysregulation
Source: MDPI journal article supplement (doi:10.3390/jcm10143034), 2021-07-08
Supplement: s1 [file s1]

**Supplemental data**

# **The Syndromes of Thrombotic Microangiopathy: A Critical Appraisal on Complement Dysregulation**

**Sjoerd A. M. E. G. Timmermans <sup>1,2,\*</sup> and Pieter van Paassen <sup>1,2</sup>**

<sup>1</sup> Department Nephrology and Clinical Immunology, Maastricht University Medical Center,  
6229 HX Maastricht, The Netherlands; p.vanpaassen@maastrichtuniversity.nl

<sup>2</sup> Department Biochemistry, Cardiovascular Research Institute Maastricht (CARIM),  
6229 HX Maastricht, The Netherlands

\* Correspondence: sjoerd.timmermans@mumc.nl

**Table S1.** Classification of rare variants in *CFH*, *CFI*, *CD46*, *CFB*, *C3*, *THBD*, and *CFHR1-5* found in patients with secondary thrombotic microangiopathy.

| Condition                                         | No.   | Gene        | cDNA                   | Protein     | MAF (%)   | PolyPhen-2/SIFT     | <i>In vitro</i>      | Significance <sup>b</sup>              |
|---------------------------------------------------|-------|-------------|------------------------|-------------|-----------|---------------------|----------------------|----------------------------------------|
| <b>STEC-HUS</b>                                   |       |             |                        |             |           |                     |                      |                                        |
| Frémeaux-Bacchi <i>et al.</i> <sup>1</sup> (N=75) | 1     | <i>CFH</i>  | c.2850G>T <sup>c</sup> | p.Q950H     | 0.1-0.4   | Prob. damaging/Del. | LOF(?) <sup>2</sup>  | Pathogenic → <b>Benign<sup>d</sup></b> |
|                                                   | 2     | <i>THBD</i> | c.1483C>T <sup>c</sup> | p.P495S     | 0.06-0.09 | Benign/Tol.         | LOF <sup>3</sup>     | <b>Pathogenic</b>                      |
|                                                   | 3     | <i>CFH</i>  | c.1145C>A              | p.A382E     | 0         | Prob. damaging/Tol. | LOF <sup>1</sup>     | <b>Pathogenic</b>                      |
|                                                   | 4     | <i>CD46</i> | c.503_504insA          | p.N170Kfs*7 | 0         | N/a                 | LOF <sup>1</sup>     | <b>Pathogenic</b>                      |
|                                                   | ?     | <i>C3</i>   | c.2203C>T <sup>c</sup> | p.R735W     | 0.1-0.3   | Prob. damaging/Del. | Normal <sup>4</sup>  | VUS → <b>Benign<sup>d</sup></b>        |
|                                                   | ?     | <i>C3</i>   | c.2203C>T <sup>c</sup> | p.R735W     | 0.1-0.3   | Prob. damaging/Del. | Normal <sup>4</sup>  | VUS → <b>Benign<sup>d</sup></b>        |
|                                                   | ?     | <i>C3</i>   | c.2203C>T <sup>c</sup> | p.R735W     | 0.1-0.3   | Prob. damaging/Del. | Normal <sup>4</sup>  | VUS → <b>Benign<sup>d</sup></b>        |
|                                                   | ?     | <i>C3</i>   | c.4369G>C              | p.D1457H    | 0.1       | Prob. damaging/Del. | —                    | VUS → <b>Benign<sup>d</sup></b>        |
|                                                   | ?     | <i>C3</i>   | c.1618G>T              | p.A540S     | <0.01     | Benign/Tol.         | —                    | <b>VUS</b>                             |
|                                                   | ?     | <i>CFB</i>  | c.978A>C <sup>c</sup>  | p.E326D     | <0.1      | Benign/Tol.         | —                    | <b>VUS</b>                             |
|                                                   | ?     | <i>CFI</i>  | c.782G>A <sup>c</sup>  | p.G261D     | 0.1       | Benign/Tol.         | Normal <sup>5</sup>  | VUS → <b>Benign<sup>d</sup></b>        |
|                                                   | ?     | <i>THBD</i> | c.829G>T               | p.G277W     | 0         | Prob. damaging/Del. | —                    | <b>VUS</b>                             |
|                                                   | ?     | <i>C3</i>   | c.476T>A               | p.V159E     | 0         | Poss. damaging/Tol. | —                    | <b>VUS</b>                             |
|                                                   | ?     | <i>CFI</i>  | c.1657C>T <sup>c</sup> | p.P553S     | 0.1       | Benign/Tol.         | —                    | VUS → <b>Benign<sup>d</sup></b>        |
| Westra <i>et al.</i> <sup>7</sup> (N=25)          | P14   | <i>C3</i>   | c.3656G>A <sup>c</sup> | p.R1219H    | <0.01     | Benign/Tol.         | —                    | <b>VUS</b>                             |
|                                                   | P21   | <i>CFH</i>  | c.2867C>T <sup>c</sup> | p.T956M     | 0.1       | Poss. damaging/Tol. | Normal <sup>8</sup>  | <b>Benign</b>                          |
|                                                   | P25   | <i>C3</i>   | c.463T>G <sup>c</sup>  | p.K155Q     | 02.-0.4   | Benign/Tol.         | GOF <sup>9</sup>     | Pathogenic → <b>Benign<sup>d</sup></b> |
|                                                   | P29   | <i>CFH</i>  | c.172T>G <sup>c</sup>  | p.S58A      | 0.02      | Benign/Tol.         | LOF <sup>8</sup>     | <b>VUS</b>                             |
| Total, n/N <sup>a</sup>                           | 9/125 |             |                        |             |           |                     |                      | <b>Pathogenic, n/N=3/125</b>           |
| <b>Post-diarrheal HUS</b>                         |       |             |                        |             |           |                     |                      |                                        |
| Frémeaux-Bacchi <i>et al.</i> <sup>1</sup> (N=33) | 5     | <i>THBD</i> | c.127G>A <sup>c</sup>  | p.A43T      | 0.2-0.4   | Benign/Tol.         | LOF <sup>3</sup>     | Pathogenic → <b>Benign<sup>d</sup></b> |
|                                                   | 6     | <i>CFH</i>  | c.3628C>T <sup>c</sup> | p.R1210C    | 0.02      | Benign/Tol.         | LOF <sup>10</sup>    | <b>Pathogenic</b>                      |
|                                                   |       | <i>C3</i>   | c.4319A>C <sup>c</sup> | p.D1440A    | 0.02-0.05 | Benign/Tol.         | —                    | <b>VUS</b>                             |
|                                                   | ?     | <i>CFH</i>  | c.2867C>T <sup>c</sup> | p.T956M     | 0.1       | Poss. damaging/Tol. | Normal <sup>8</sup>  | VUS → <b>Benign<sup>d</sup></b>        |
|                                                   | ?     | <i>C3</i>   | c.4855A>C <sup>c</sup> | p.S1619R    | 0.1-0.2   | Poss. damaging/Tol. | Normal <sup>11</sup> | VUS → <b>Benign<sup>d</sup></b>        |
|                                                   | ?     | <i>C3</i>   | c.4855A>C <sup>c</sup> | p.S1619R    | 0.1-0.2   | Poss. damaging/Tol. | Normal <sup>11</sup> | VUS → <b>Benign<sup>d</sup></b>        |
|                                                   | ?     | <i>C3</i>   | c.4177C>T              | p.R1393W    | <0.01     | Poss. damaging/Del. | —                    | <b>VUS</b>                             |
| Total, n/N <sup>a</sup>                           | 2/33  |             |                        |             |           |                     |                      | <b>Pathogenic, n/N=1/33</b>            |
| <b>Pneumococcal HUS</b>                           |       |             |                        |             |           |                     |                      |                                        |
| Szilágyi <i>et al.</i> <sup>12</sup> (N=5)        | 3     | <i>CFH</i>  | c.3445C>T              | p.R1149X    | <0.01     | N/a                 | —                    | <b>Pathogenic</b>                      |
|                                                   | 4     | <i>CFI</i>  | c.148C>G <sup>c</sup>  | p.P50A      | <0.02     | Prob. damaging/Del. | LOF <sup>13</sup>    | <b>Pathogenic</b>                      |
|                                                   | 5     | <i>THBD</i> | c.131C>T               | p.T44I      | <0.01     | Benign/Tol.         | —                    | <b>VUS</b>                             |
| Total, n/N <sup>a</sup>                           | 3/5   |             |                        |             |           |                     |                      | <b>Pathogenic, n/N=2/5</b>             |

|                                                |       |              |                          |              |           |                     |                      |                                  |
|------------------------------------------------|-------|--------------|--------------------------|--------------|-----------|---------------------|----------------------|----------------------------------|
| <b>Drug-induced TMA</b>                        |       |              |                          |              |           |                     |                      |                                  |
| Le Clech <i>et al.</i> <sup>14</sup> (N=32)    | 3     | <i>CFI</i>   | c.11T>A                  | p.L4H        | 0.02      | Benign/Tol.         | –                    | VUS                              |
|                                                | 6     | <i>CFH</i>   | c.3596T>C <sup>c</sup>   | p.F1199S     | 0         | Poss. damaging/Del. | LOF <sup>15</sup>    | Pathogenic                       |
| Total, n/N <sup>a</sup>                        | 2/32  |              |                          |              |           |                     |                      | Pathogenic, n/N=1/32             |
| <b>Cancer</b>                                  |       |              |                          |              |           |                     |                      |                                  |
| Le Clech <i>et al.</i> <sup>14</sup> (N=11)    | 2     | <i>THBD</i>  | c.91G>A                  | p.V31I       | 0         | Benign/Tol.         | –                    | VUS                              |
|                                                | 5     | <i>CFH</i>   | c.3047A>G <sup>c</sup>   | p.Y1016C     | 0         | Prob. damaging/Del. | –                    | Pathogenic                       |
| Total, n/N <sup>a</sup>                        | 2/11  |              |                          |              |           |                     |                      | Pathogenic, n/N=1/11             |
| <b>Autoimmunity</b>                            |       |              |                          |              |           |                     |                      |                                  |
| Le Clech <i>et al.</i> <sup>14</sup> (N=26)    | 1     | <i>THBD</i>  | c.707C>G                 | p.A236G      | 0.02      | Benign/Tol.         | –                    | VUS                              |
| Cavero <i>et al.</i> <sup>16</sup> (N=8)       | 22    | <i>CFHR1</i> | c.869T>C                 | p.L290S      | <0.01     | Benign/Tol.         | –                    | Pathogenic → VUS <sup>d</sup>    |
|                                                |       | <i>CFHR1</i> | c.887C>T                 | p.A296V      | <0.1      | Benign/Tol.         | –                    | Pathogenic → VUS <sup>d</sup>    |
| Chaturverdi <i>et al.</i> <sup>17</sup> (N=10) | CAPS3 | <i>THBD</i>  | c.1502C>T <sup>c</sup>   | p.P501L      | 0.2       | Benign/Del.         | LOF <sup>3</sup>     | Pathogenic → Benign <sup>d</sup> |
|                                                | CAPS6 | <i>CFHR4</i> | c.860G>A                 | p.R287H      | <0.01     | Benign/Tol.         | –                    | VUS                              |
| Park <i>et al.</i> <sup>18</sup> (N=10)        | 1     | <i>THBD</i>  | c.127G>A <sup>c</sup>    | p.A43T       | 0.2-0.4   | Benign/Tol.         | LOF <sup>3</sup>     | Benign                           |
|                                                | 2     | <i>CFH</i>   | c.184G>A <sup>c</sup>    | p.V62I       | >5        | Benign/Tol.         | –                    | Benign                           |
|                                                |       | <i>CFH</i>   | c.1204C>T <sup>c</sup>   | p.H402Y      | >5        | Benign/Tol.         | –                    | Benign                           |
|                                                | 6     | <i>CFB</i>   | c.724A>C <sup>c</sup>    | p.I242L      | <0.2      | Benign/Tol.         | –                    | VUS                              |
|                                                |       | <i>CFHR5</i> | c.384G>T                 | p.S128S      | 0.1       | Synonymous          | –                    | Benign                           |
|                                                |       | <i>CD46</i>  | c.989-78G>A              | N/a          | 35        | N/a                 | –                    | Benign                           |
|                                                |       | <i>CFH</i>   | c.1204C>T <sup>c</sup>   | p.H402Y      | >5        | Benign/Tol.         | –                    | Benign                           |
|                                                | 8     | <i>THBD</i>  | c.1456G>T <sup>c</sup>   | p.D486Y      | 0.02-0.2  | Benign/Tol.         | LOF <sup>3</sup>     | VUS                              |
|                                                |       | <i>CFH</i>   | c.184G>A <sup>c</sup>    | p.V62I       | >5        | Benign/Tol.         | –                    | Benign                           |
|                                                | 9     | <i>CD46</i>  | c.989-78G>A              | N/a          | 35        | N/a                 | –                    | Benign                           |
|                                                | 11    | <i>CFI</i>   | c.1217G>A                | p.R406H      | 0.1-1     | Benign/Tol.         | Normal <sup>19</sup> | Benign                           |
| Total, n/N <sup>a</sup>                        | 5/54  |              |                          |              |           |                     |                      | Pathogenic, n/N=0/54             |
| <b>HSCT-TMA</b>                                |       |              |                          |              |           |                     |                      |                                  |
| Jodele <i>et al.</i> <sup>20</sup> (N=34)      | ?     | <i>CD46</i>  | c.971C>T <sup>c</sup>    | p.P324L      | 0.2       | Prob. damaging/Del. | LOF <sup>21</sup>    | VUS → Benign <sup>d</sup>        |
|                                                | ?     | <i>CFI</i>   | c.1246A>C <sup>c</sup>   | p.I416L      | 0.4       | Benign/Tol.         | LOF <sup>13</sup>    | Pathogenic → Benign <sup>d</sup> |
|                                                | ?     | <i>CD46</i>  | c.796G>A <sup>c</sup>    | p.D266N      | 0.3-0.4   | Benign/Tol.         | –                    | VUS → Benign <sup>d</sup>        |
|                                                | ?     | <i>C3</i>    | c.1243C>A                | p.P415T      | 0         | Benign/Tol.         | –                    | VUS                              |
|                                                | ?     | <i>THBD</i>  | c.1208G>A <sup>c</sup>   | p.R403K      | 0.02-0.03 | Benign/Tol.         | –                    | VUS                              |
|                                                |       | <i>CFHR5</i> | c.486 487insA            | p.E163Rfs*35 | 0.2       | N/a                 | –                    | Pathogenic → Benign <sup>d</sup> |
|                                                |       | <i>CFHR5</i> | c.622T>C                 | p.C208R      | 0.2       | Prob. damaging/Del. | –                    | VUS → Benign <sup>d</sup>        |
|                                                | ?     | <i>CFI</i>   | c.1217G>A                | p.R406H      | 0.1-1     | Benign/Tol.         | Normal <sup>19</sup> | VUS → Benign <sup>d</sup>        |
|                                                | ?     | <i>C3</i>    | c.463T>G <sup>c</sup>    | p.K155Q      | 0.2-0.4   | Benign/Tol.         | GOF <sup>9</sup>     | Pathogenic → Benign <sup>d</sup> |
|                                                | ?     | <i>CFI</i>   | c.1534+5G>T <sup>c</sup> | N/a          | 0.9-1.1   | N/a                 | –                    | Pathogenic → Benign <sup>d</sup> |
|                                                | ?     | <i>CFI</i>   | c.1534+5G>T <sup>c</sup> | N/a          | 0.9-1.1   | N/a                 | –                    | Pathogenic → Benign <sup>d</sup> |

|                                              |        |              |                        |                      |          |                     |                      |                                         |
|----------------------------------------------|--------|--------------|------------------------|----------------------|----------|---------------------|----------------------|-----------------------------------------|
| Jodele <i>et al.</i> <sup>22</sup> (N=30)    | ?      | <i>CFI</i>   | c.1657C>T <sup>c</sup> | p.P553S              | 0.1      | Benign/Tol.         | —                    | VUS → <b>Benign</b> <sup>d</sup>        |
|                                              |        | <i>CFI</i>   | c.1322A>G <sup>c</sup> | p.K441R              | 0.1      | Benign/Tol.         | —                    | Pathogenic → <b>Benign</b> <sup>d</sup> |
|                                              |        | <i>CFB</i>   | c.1697A>C <sup>c</sup> | p.E566A              | 0.7      | Benign/Tol.         | —                    | VUS → <b>Benign</b> <sup>d</sup>        |
|                                              | ?      | <i>CFB</i>   | c.1729G>A <sup>c</sup> | p.V577I              | 0.01     | Benign/Tol.         | —                    | VUS                                     |
|                                              |        | <i>CFB</i>   | c.2005G>C <sup>c</sup> | p.V669L              | 0.01     | Benign/Tol.         | —                    | VUS                                     |
|                                              | 1      | <i>C3</i>    | c.2203C>T <sup>c</sup> | p.R735W              | 0.2-0.3  | Prob. damaging/Del. | Normal <sup>4</sup>  | Pathogenic → <b>Benign</b> <sup>d</sup> |
|                                              |        | <i>CFHR3</i> | c.839_840del           | p.I280fs             | 0.1      | N/a                 | —                    | VUS → <b>Benign</b> <sup>d</sup>        |
|                                              | 2      | <i>CFB</i>   | c.95G>A                | p.R32Q               | >5       | Benign/Tol.         | —                    | VUS → <b>Benign</b> <sup>d</sup>        |
|                                              |        | <i>CFHR3</i> | c.786A>T               | p.P262P              | >5       | N/a                 | —                    | VUS → <b>Benign</b> <sup>d</sup>        |
|                                              | 3      | <i>CFB</i>   | c.95G>A                | p.R32Q               | >5       | Benign/Tol.         | —                    | VUS → <b>Benign</b> <sup>d</sup>        |
|                                              | 4      | <i>CFHR5</i> | c.486_487insAA         | p.E163fs             | 0        | N/a.                | —                    | VUS                                     |
|                                              | 5      | <i>CFB</i>   | c.95G>A                | p.R32Q               | >5       | Benign/Tol.         | —                    | VUS → <b>Benign</b> <sup>d</sup>        |
|                                              |        | <i>CFH</i>   | c.2850G>T <sup>c</sup> | p.Q950H              | 0.1-0.4  | Prob. damaging/Del. | LOF(?) <sup>2</sup>  | VUS → <b>Benign</b> <sup>d</sup>        |
|                                              | 6      | <i>THBD</i>  | c.1502C>T <sup>c</sup> | p.P501L              | 0.2      | Benign/Del.         | LOF <sup>3</sup>     | Pathogenic → <b>Benign</b> <sup>d</sup> |
|                                              | 7      | <i>CFHR3</i> | c.786A>T               | p.P262P              | >5       | N/a                 | —                    | VUS → <b>Benign</b> <sup>d</sup>        |
|                                              |        | <i>CFHR5</i> | c.1067G>A              | p.R356H              | >2       | Poss. damaging/Del. | —                    | <b>Benign</b>                           |
|                                              | 8      | <i>CFB</i>   | c.95G>A                | p.R32Q               | >5       | Benign/Tol.         | —                    | VUS → <b>Benign</b> <sup>d</sup>        |
|                                              | 11     | <i>CFB</i>   | c.559G>A               | p.V187I              | 0        | Poss. damaging/Del. | —                    | VUS                                     |
|                                              |        | <i>CD46</i>  | c.1058C>T <sup>c</sup> | p.A353V              | >1       | Benign/Tol.         | Normal <sup>23</sup> | VUS → <b>Benign</b> <sup>d</sup>        |
|                                              | 13     | <i>CFB</i>   | c.1697A>C <sup>c</sup> | p.E556A              | 0.7      | Benign/Tol.         | —                    | VUS → <b>Benign</b> <sup>d</sup>        |
|                                              | 14     | <i>CFB</i>   | c.1697A>C <sup>c</sup> | p.E556A              | 0.7      | Benign/Tol.         | —                    | VUS → <b>Benign</b> <sup>d</sup>        |
|                                              |        | <i>CFHR1</i> | c.310C>T               | p.H104Y              | <0.03    | Benign/Tol.         | —                    | VUS                                     |
|                                              | 18     | <i>CFB</i>   | c.1697A>C <sup>c</sup> | p.E556A              | 0.7      | Benign/Tol.         | —                    | VUS → <b>Benign</b> <sup>d</sup>        |
|                                              |        | <i>CFH</i>   | c.3506T>C              | p.I1169T             | <0.01    | Benign/Del.         | —                    | VUS                                     |
| Total, n/N <sup>a</sup>                      |        | 7/64         |                        | Pathogenic, n/N=0/64 |          |                     |                      |                                         |
| DGKE-HUS                                     |        |              |                        |                      |          |                     |                      |                                         |
| Azukaitis <i>et al.</i> <sup>24</sup> (N=44) | HUS39  | <i>THBD</i>  | c.1456G>T <sup>c</sup> | p.D486Y              | 0.02-0.2 | Benign/Tol.         | LOF <sup>3</sup>     | Pathogenic → VUS <sup>d</sup>           |
|                                              | HUS40  | <i>THBD</i>  | c.1456G>T <sup>c</sup> | p.D486Y              | 0.02-0.2 | Benign/Tol.         | LOF <sup>3</sup>     | Pathogenic → VUS <sup>d</sup>           |
|                                              | HUS272 | <i>C3</i>    | c.784G>T <sup>c</sup>  | p.G262W              | 0        | Prob. damaging/Del. | —                    | VUS                                     |
| Total, n/N <sup>a</sup>                      |        | 3/44         |                        | Pathogenic, n/N=0/44 |          |                     |                      |                                         |
| Cobalamin C deficiency                       |        |              |                        |                      |          |                     |                      |                                         |
| Beck <i>et al.</i> <sup>25</sup>             | 27     | <i>CFH</i>   | Unknown                | N/a                  | N/a      | N/a                 | N/a                  | VUS                                     |
| Total, n/N <sup>a</sup>                      |        | 1/27         |                        | Pathogenic, n/N=0/27 |          |                     |                      |                                         |

<sup>a</sup> Number indicates pathogenic variants and variants of uncertain significance.

<sup>b</sup> The classification of variants was based on international standards.<sup>26, 27</sup> Pathogenic variants (depicted in red) were defined as those with functional studies supporting a defect in complement regulation, including null variants in genes linked to complement regulation (not including *CFB* and *C3*) and at least one of the following: located in a mutational hotspot, located in a functional domain, and/or cluster in patients with

primary atypical hemolytic uremic syndrome.<sup>27</sup> Benign variants (depicted in green) were defined as those with a minor allele frequency of  $\geq 0.1\%$  and/or functional studies supporting normal complement regulation. Rare variants, that is, those with a minor allele frequency of  $< 0.1\%$ , not fulfilling these criteria have been classified as uncertain significance.

<sup>c</sup> Variant has been identified in the database of complement gene variants (<http://www.complement-db.org/home.php>).

<sup>d</sup> Variant has been reclassified.

Del., deleterious. DGKE, diacylglycerol kinase epsilon. GOF, gain-of-function. HSCT-TMA, hematopoietic stem cell transplantation-thrombotic microangiopathy. HUS, hemolytic uremic syndrome. LOF, loss-of-function. MAF, minor allele frequency according to the Exome Variant Server (EVS) and Genome Aggregation Database (gnomAD). Prob. damaging, probably damaging. Poss. damaging, possibly damaging. STEC, Shiga toxin-producing *E. coli*. Tol., tolerated. VUS, variant of uncertain significance.

## References

1. Fremeaux-Bacchi, V.; Sellier-Leclerc, A. L.; Vieira-Martins, P.; Limou, S.; Kwon, T.; Lahoche, A.; Novo, R.; Llanas, B.; Nobili, F.; Roussey, G.; Cailliez, M.; Ulinski, T.; Deschenes, G.; Alberti, C.; Weill, F. X.; Mariani, P.; Loirat, C., Complement Gene Variants and Shiga Toxin-Producing *Escherichia coli*-Associated Hemolytic Uremic Syndrome: Retrospective Genetic and Clinical Study. *Clin J Am Soc Nephrol* **2019**, *14* (3), 364-377.
2. Mohlin, F. C.; Nilsson, S. C.; Levart, T. K.; Golubovic, E.; Rusai, K.; Muller-Sacherer, T.; Arbeiter, K.; Pallinger, E.; Szarvas, N.; Csuka, D.; Szilagyi, A.; Villoutreix, B. O.; Prohaszka, Z.; Blom, A. M., Functional characterization of two novel non-synonymous alterations in CD46 and a Q950H change in factor H found in atypical hemolytic uremic syndrome patients. *Mol Immunol* **2015**, *65* (2), 367-76.
3. Delvaeye, M.; Noris, M.; De Vriese, A.; Esmon, C. T.; Esmon, N. L.; Ferrell, G.; Del-Favero, J.; Plaisance, S.; Claes, B.; Lambrechts, D.; Zoja, C.; Remuzzi, G.; Conway, E. M., Thrombomodulin mutations in atypical hemolytic-uremic syndrome. *N Engl J Med* **2009**, *361* (4), 345-57.
4. Fremeaux-Bacchi, V.; Miller, E. C.; Liszewski, M. K.; Strain, L.; Blouin, J.; Brown, A. L.; Moghal, N.; Kaplan, B. S.; Weiss, R. A.; Lhotta, K.; Kapur, G.; Mattoo, T.; Nivet, H.; Wong, W.; Gie, S.; Hurault de Ligny, B.; Fischbach, M.; Gupta, R.; Hauhart, R.; Meunier, V.; Loirat, C.; Dragon-Durey, M. A.; Fridman, W. H.; Janssen, B. J.; Goodship, T. H.; Atkinson, J. P., Mutations in complement C3 predispose to development of atypical hemolytic uremic syndrome. *Blood* **2008**, *112* (13), 4948-52.
5. Nilsson, S. C.; Karpman, D.; Vaziri-Sani, F.; Kristofferson, A. C.; Salomon, R.; Provot, F.; Fremeaux-Bacchi, V.; Trouw, L. A.; Blom, A. M., A mutation in factor I that is associated with atypical hemolytic uremic syndrome does not affect the function of factor I in complement regulation. *Mol Immunol* **2007**, *44* (8), 1835-44.
6. Ahlenstiel-Grunow, T.; Hachmeister, S.; Bange, F. C.; Wehling, C.; Kirschfink, M.; Bergmann, C.; Pape, L., Systemic complement activation and complement gene analysis in enterohaemorrhagic *Escherichia coli*-associated paediatric haemolytic uraemic syndrome. *Nephrol Dial Transplant* **2016**, *31* (7), 1114-21.
7. Westra, D.; Volokhina, E. B.; van der Molen, R. G.; van der Velden, T. J.; Jeronimus-Klaasen, A.; Goertz, J.; Gracchi, V.; Dorrestijn, E. M.; Bouts, A. H.; Keijzer-Veen, M. G.; van Wijk, J. A.; Bakker, J. A.; Roos, A.; van den Heuvel, L. P.; van de Kar, N. C., Serological and genetic complement alterations in infection-induced and complement-mediated hemolytic uremic syndrome. *Pediatr Nephrol* **2017**, *32* (2), 297-309.
8. Merinero, H. M.; Garcia, S. P.; Garcia-Fernandez, J.; Arjona, E.; Tortajada, A.; Rodriguez de Cordoba, S., Complete functional characterization of disease-associated genetic variants in the complement factor H gene. *Kidney Int* **2018**, *93* (2), 470-481.
9. Seddon, J. M.; Yu, Y.; Miller, E. C.; Reynolds, R.; Tan, P. L.; Gowrisankar, S.; Goldstein, J. I.; Triebwasser, M.; Anderson, H. E.; Zerbib, J.; Kavanagh, D.; Souied, E.; Katsanis, N.; Daly, M. J.; Atkinson, J. P.; Raychaudhuri, S., Rare variants in CFI, C3 and C9 are associated with high risk of advanced age-related macular degeneration. *Nat Genet* **2013**, *45* (11), 1366-70.
10. Ferreira, V. P.; Herbert, A. P.; Cortes, C.; McKee, K. A.; Blaum, B. S.; Esswein, S. T.; Uhrin, D.; Barlow, P. N.; Pangburn, M. K.; Kavanagh, D., The binding of factor H to a complex of physiological polyanions and C3b on cells is impaired in atypical hemolytic uremic syndrome. *J Immunol* **2009**, *182* (11), 7009-18.
11. Mohlin, F. C.; Gros, P.; Mercier, E.; Gris, J. R.; Blom, A. M., Analysis of C3 Gene Variants in Patients With Idiopathic Recurrent Spontaneous Pregnancy Loss. *Front Immunol* **2018**, *9*, 1813.
12. Szilagyi, A.; Kiss, N.; Bereczki, C.; Talosi, G.; Racz, K.; Turi, S.; Gyorke, Z.; Simon, E.; Horvath, E.; Kelen, K.; Reusz, G. S.; Szabo, A. J.; Tulassay, T.; Prohaszka, Z., The role of complement in *Streptococcus pneumoniae*-associated haemolytic uraemic syndrome. *Nephrol Dial Transplant* **2013**, *28* (9), 2237-45.
13. Bienaime, F.; Dragon-Durey, M. A.; Regnier, C. H.; Nilsson, S. C.; Kwan, W. H.; Blouin, J.; Jablonski, M.; Renault, N.; Rameix-Welti, M. A.; Loirat, C.; Sautes-Fridman, C.; Villoutreix, B. O.; Blom, A. M.; Fremeaux-Bacchi, V., Mutations in components of complement influence the outcome of Factor I-associated atypical hemolytic uremic syndrome. *Kidney Int* **2010**, *77* (4), 339-49.
14. Le Clech, A.; Simon-Tillaux, N.; Provot, F.; Delmas, Y.; Vieira-Martins, P.; Limou, S.; Halimi, J. M.; Le Quintec, M.; Lebourg, L.; Grange, S.; Karras, A.; Ribes, D.; Jourde-Chiche, N.; Rondeau, E.; Fremeaux-Bacchi, V.; Fakhouri, F., Atypical and secondary hemolytic uremic syndromes have a distinct presentation and no common genetic risk factors. *Kidney Int* **2019**, *95* (6), 1443-1452.
15. Dragon-Durey, M. A.; Fremeaux-Bacchi, V.; Loirat, C.; Blouin, J.; Niaudet, P.; Deschenes, G.; Coppo, P.; Herman Fridman, W.; Weiss, L., Heterozygous and homozygous factor h deficiencies associated with hemolytic uremic syndrome or membranoproliferative glomerulonephritis: report and genetic analysis of 16 cases. *J Am Soc Nephrol* **2004**, *15* (3), 787-95.
16. Caverio, T.; Rabasco, C.; Lopez, A.; Roman, E.; Avila, A.; Sevillano, A.; Huerta, A.; Rojas-Rivera, J.; Fuentes, C.; Blasco, M.; Jarque, A.; Garcia, A.; Mendizabal, S.; Gavela, E.; Macia, M.; Quintana, L. F.; Maria Romera, A.; Borrego, J.; Arjona, E.; Espinosa, M.; Portoles, J.; Gracia-Iguacel, C.; Gonzalez-Parra, E.; Aljama, P.; Morales, E.; Cao, M.; Rodriguez de Cordoba, S.; Praga, M., Eculizumab in secondary atypical hemolytic uraemic syndrome. *Nephrol Dial Transplant* **2017**, *32* (3), 466-474.
17. Chaturvedi, S.; Braunstein, E. M.; Yuan, X.; Yu, J.; Alexander, A.; Chen, H.; Gavrilaki, E.; Alluri, R.; Streiff, M. B.; Petri, M.; Crowther, M. A.; McCrae, K. R.; Brodsky, R. A., Complement activity and complement regulatory gene mutations are associated with thrombosis in APS and CAPS. *Blood* **2020**, *135* (4), 239-251.
18. Park, M. H.; Caselman, N.; Ulmer, S.; Weitz, I. C., Complement-mediated thrombotic microangiopathy associated with lupus nephritis. *Blood Adv* **2018**, *2* (16), 2090-2094.
19. de Jong, S.; Volokhina, E. B.; de Breuk, A.; Nilsson, S. C.; de Jong, E. K.; van der Kar, N.; Bakker, B.; Hoyng, C. B.; van den Heuvel, L. P.; Blom, A. M.; den Hollander, A. I., Effect of rare coding variants in the CFI gene on Factor I expression levels. *Hum Mol Genet* **2020**, *29* (14), 2313-2324.
20. Jodele, S.; Zhang, K.; Zou, F.; Laskin, B.; Dandoy, C. E.; Myers, K. C.; Lane, A.; Meller, J.; Medvedovic, M.; Chen, J.; Davies, S. M., The genetic fingerprint of susceptibility for transplant-associated thrombotic microangiopathy. *Blood* **2016**, *127* (8), 989-96.
21. Mohlin, F. C.; Mercier, E.; Fremeaux-Bacchi, V.; Liszewski, M. K.; Atkinson, J. P.; Gris, J. C.; Blom, A. M., Analysis of genes coding for CD46, CD55, and C4b-binding protein in patients with idiopathic, recurrent, spontaneous pregnancy loss. *Eur J Immunol* **2013**, *43* (6), 1617-29.
22. Jodele, S.; Dandoy, C. E.; Lane, A.; Laskin, B. L.; Teusink-Cross, A.; Myers, K. C.; Wallace, G.; Nelson, A.; Bleesing, J.; Chima, R. S.; Hirsch, R.; Ryan, T. D.; Benoit, S.; Mizuno, K.; Warren, M.; Davies, S. M., Complement blockade for TA-TMA: lessons learned from a large pediatric cohort treated with eculizumab. *Blood* **2020**, *135* (13), 1049-1057.
23. Caprioli, J.; Noris, M.; Brioschi, S.; Pianetti, G.; Bettinaglio, P.; Mele, C.; Bresin, E.; Cassis, L.; Gamba, S.; Poratti, F.; Bucchioni, S.; Monteferrante, G.; Fang, C. J.; Liszewski, M. K.; Kavanagh, D.; Atkinson, J. P.; Remuzzi, G.; International Registry of, R.; Familial, H. T., Genetics of HUS: the impact of MCP, CFH, and IF mutations on clinical presentation, response to treatment, and outcome. *Blood* **2006**, *108* (4), 1267-79.
24. Azukaitis, K.; Simkova, E.; Majid, M. A.; Galiano, M.; Benz, K.; Amann, K.; Bockmeyer, C.; Gajjar, R.; Meyers, K. E.; Cheong, H. I.; Lange-Sperandio, B.; Jungraithmayr, T.; Fremeaux-Bacchi, V.; Bergmann, C.; Bereczki, C.; Miklaszewska, M.; Csuka, D.;

- Prohaszka, Z.; Killen, P.; Gipson, P.; Sampson, M. G.; Lemaire, M.; Schaefer, F., The Phenotypic Spectrum of Nephropathies Associated with Mutations in Diacylglycerol Kinase epsilon. *J Am Soc Nephrol* **2017**, *28* (10), 3066-3075.
25. Beck, B. B.; van Spronsen, F.; Diepstra, A.; Berger, R. M.; Komhoff, M., Renal thrombotic microangiopathy in patients with cblC defect: review of an under-recognized entity. *Pediatr Nephrol* **2017**, *32* (5), 733-741.
  26. Richards, S.; Aziz, N.; Bale, S.; Bick, D.; Das, S.; Gastier-Foster, J.; Grody, W. W.; Hegde, M.; Lyon, E.; Spector, E.; Voelkerding, K.; Rehm, H. L.; Committee, A. L. Q. A., Standards and guidelines for the interpretation of sequence variants: a joint consensus recommendation of the American College of Medical Genetics and Genomics and the Association for Molecular Pathology. *Genet Med* **2015**, *17* (5), 405-24.
  27. Osborne, A. J.; Breno, M.; Borsa, N. G.; Bu, F.; Fremeaux-Bacchi, V.; Gale, D. P.; van den Heuvel, L. P.; Kavanagh, D.; Noris, M.; Pinto, S.; Rallapalli, P. M.; Remuzzi, G.; Rodriguez de Cordoba, S.; Ruiz, A.; Smith, R. J. H.; Vieira-Martins, P.; Volokhina, E.; Wilson, V.; Goodship, T. H. J.; Perkins, S. J., Statistical Validation of Rare Complement Variants Provides Insights into the Molecular Basis of Atypical Hemolytic Uremic Syndrome and C3 Glomerulopathy. *J Immunol* **2018**, *200* (7), 2464-2478.
